# Supplementary material for: Identification of diagnostic DNA methylation markers in the blood of Japanese Alzheimer’s disease patients using methylation capture sequencing
Source: Research Square preprint supplement (doi:10.21203/rs.3.rs-6200381/v1), 2025-04-03
Supplement: Supplementary file 1 [file e1a383dab24a50165e92faea.xlsx]

## Sheet: Table S1
Supplementary Table 1. Statistics for MC-seq of genomes of the first cohort
Subject status	AD+	CN-	CN-	AD+	AD+	CN-	CN-	CN-	CN-	CN-	CN-	AD+	AD+	AD+	CN-	AD+	CN-	AD+	AD+	AD+	AD+	CN-	CN-	AD+
Sample ID	PG1892-08A03-H3	PG1892-22A01-H3	PG1892-17A09-H3	PG1892-28A16-H3	PG1892-25A06-H3	PG1892-20A05-H3	PG1892-24A16-H3	PG1892-14A12-H3	PG1892-18A15-H3	PG1892-21A12-H3	PG1892-13A06-H3	PG1892-03A14-H3	PG1892-02A07-H3	PG1892-11A05-H3	PG1892-23A03-H3	PG1892-10A02-H3	PG1892-19A04-H3	PG1892-12A19-H3	PG1892-29A13-H3	PG1892-26A05-H3	PG1892-07A01-H3	PG1892-16A02-H3	PG1892-15A14-H3	PG1892-06A18-H3
Reference Genome	Homo sapiens (UCSC hg19)	Homo sapiens (UCSC hg19)	Homo sapiens (UCSC hg19)	Homo sapiens (UCSC hg19)	Homo sapiens (UCSC hg19)	Homo sapiens (UCSC hg19)	Homo sapiens (UCSC hg19)	Homo sapiens (UCSC hg19)	Homo sapiens (UCSC hg19)	Homo sapiens (UCSC hg19)	Homo sapiens (UCSC hg19)	Homo sapiens (UCSC hg19)	Homo sapiens (UCSC hg19)	Homo sapiens (UCSC hg19)	Homo sapiens (UCSC hg19)	Homo sapiens (UCSC hg19)	Homo sapiens (UCSC hg19)	Homo sapiens (UCSC hg19)	Homo sapiens (UCSC hg19)	Homo sapiens (UCSC hg19)	Homo sapiens (UCSC hg19)	Homo sapiens (UCSC hg19)	Homo sapiens (UCSC hg19)	Homo sapiens (UCSC hg19)
Paired End	TRUE	TRUE	TRUE	TRUE	TRUE	TRUE	TRUE	TRUE	TRUE	TRUE	TRUE	TRUE	TRUE	TRUE	TRUE	TRUE	TRUE	TRUE	TRUE	TRUE	TRUE	TRUE	TRUE	TRUE
Metrics deliverable	Default	Default	Default	Default	Default	Default	Default	Default	Default	Default	Default	Default	Default	Default	Default	Default	Default	Default	Default	Default	Default	Default	Default	Default
Enrichment summary format version	3.0.0	3.0.0	3.0.0	3.0.0	3.0.0	3.0.0	3.0.0	3.0.0	3.0.0	3.0.0	3.0.0	3.0.0	3.0.0	3.0.0	3.0.0	3.0.0	3.0.0	3.0.0	3.0.0	3.0.0	3.0.0	3.0.0	3.0.0	3.0.0
Target manifest	TruSeq_Methyl_Capture_EPIC_regions_v1.0.txt	TruSeq_Methyl_Capture_EPIC_regions_v1.0.txt	TruSeq_Methyl_Capture_EPIC_regions_v1.0.txt	TruSeq_Methyl_Capture_EPIC_regions_v1.0.txt	TruSeq_Methyl_Capture_EPIC_regions_v1.0.txt	TruSeq_Methyl_Capture_EPIC_regions_v1.0.txt	TruSeq_Methyl_Capture_EPIC_regions_v1.0.txt	TruSeq_Methyl_Capture_EPIC_regions_v1.0.txt	TruSeq_Methyl_Capture_EPIC_regions_v1.0.txt	TruSeq_Methyl_Capture_EPIC_regions_v1.0.txt	TruSeq_Methyl_Capture_EPIC_regions_v1.0.txt	TruSeq_Methyl_Capture_EPIC_regions_v1.0.txt	TruSeq_Methyl_Capture_EPIC_regions_v1.0.txt	TruSeq_Methyl_Capture_EPIC_regions_v1.0.txt	TruSeq_Methyl_Capture_EPIC_regions_v1.0.txt	TruSeq_Methyl_Capture_EPIC_regions_v1.0.txt	TruSeq_Methyl_Capture_EPIC_regions_v1.0.txt	TruSeq_Methyl_Capture_EPIC_regions_v1.0.txt	TruSeq_Methyl_Capture_EPIC_regions_v1.0.txt	TruSeq_Methyl_Capture_EPIC_regions_v1.0.txt	TruSeq_Methyl_Capture_EPIC_regions_v1.0.txt	TruSeq_Methyl_Capture_EPIC_regions_v1.0.txt	TruSeq_Methyl_Capture_EPIC_regions_v1.0.txt	TruSeq_Methyl_Capture_EPIC_regions_v1.0.txt
Total length of targeted reference	107403887	107403887	107403887	107403887	107403887	107403887	107403887	107403887	107403887	107403887	107403887	107403887	107403887	107403887	107403887	107403887	107403887	107403887	107403887	107403887	107403887	107403887	107403887	107403887
Number of targeted regions	437792	437792	437792	437792	437792	437792	437792	437792	437792	437792	437792	437792	437792	437792	437792	437792	437792	437792	437792	437792	437792	437792	437792	437792
Padding size	150	150	150	150	150	150	150	150	150	150	150	150	150	150	150	150	150	150	150	150	150	150	150	150
Targeted unique aligned reads	95506382	84659814	74113492	64610953	69221277	82975206	80816853	78934078	83577419	84885207	68446407	103216443	90286004	69926403	94463408	96350829	78429764	78437881	59470715	85570064	73826347	79513241	67349789	80143314
Padded target unique aligned reads	103235319	91578780	79302804	69310953	74300550	89414973	87012438	84500861	90155331	91461045	73633107	111173633	98266772	75643432	101422285	103757152	84655074	83505989	64500057	92541929	79485073	86171249	72427052	86745975
Unique read enrichment	80.9	78.77	81.32	81.68	78.3	79.27	79.24	80.66	80.48	79.27	80.24	77.89	76.83	79.64	79.55	80.16	79.08	81.43	77.29	77.42	81.33	80	80.21	77.22
Padded unique read enrichment	87.44	85.2	87.01	87.62	84.05	85.43	85.31	86.35	86.81	85.41	86.32	83.89	83.63	86.16	85.41	86.32	85.35	86.69	83.83	83.73	87.56	86.7	86.26	83.58
Total PF reads	160965040	145398460	117974478	107974718	114624326	139863988	137788362	143655846	135231760	143009272	123656908	171008292	152638048	117043550	159937828	160639392	132301098	128290212	104029522	148324490	123862446	129801542	121930336	137805876
Total PF read 1	80482520	72699230	58987239	53987359	57312163	69931994	68894181	71827923	67615880	71504636	61828454	85504146	76319024	58521775	79968914	80319696	66150549	64145106	52014761	74162245	61931223	64900771	60965168	68902938
Total PF read 2	80482520	72699230	58987239	53987359	57312163	69931994	68894181	71827923	67615880	71504636	61828454	85504146	76319024	58521775	79968914	80319696	66150549	64145106	52014761	74162245	61931223	64900771	60965168	68902938
Total aligned reads	135371536	121897914	99984306	90194316	96116090	116819986	115007354	120511774	113928280	119778974	104553136	144488832	127735402	97698844	134700910	134353968	110729196	107421748	86499926	124269724	104096564	109220298	103372412	116105800
Unique aligned reads	118058296	107480998	91143152	79105918	88402900	104667558	101990162	97862402	103852930	107085604	85302298	132519348	117507708	87799178	118743562	120201884	99183414	96330542	76944508	110526550	90773622	99391256	83964146	103788904
Total duplicate aligned reads	17313240	14416916	8841154	11088398	7713190	12152428	13017192	22649372	10075350	12693370	19250838	11969484	10227694	9899666	15957348	14152084	11545782	11091206	9555418	13743174	13322942	9829042	19408266	12316896
Percent duplicate aligned reads	12.79	11.83	8.84	12.29	8.02	10.4	11.32	18.79	8.84	10.6	18.41	8.28	8.01	10.13	11.85	10.53	10.43	10.32	11.05	11.06	12.8	9	18.78	10.61
Total aligned read 1	67685768	60948957	49992153	45097158	48058045	58409993	57503677	60255887	56964140	59889487	52276568	72244416	63867701	48849422	67350455	67176984	55364598	53710874	43249963	62134862	52048282	54610149	51686206	58052900
Total aligned read 2	67685768	60948957	49992153	45097158	48058045	58409993	57503677	60255887	56964140	59889487	52276568	72244416	63867701	48849422	67350455	67176984	55364598	53710874	43249963	62134862	52048282	54610149	51686206	58052900
Percent aligned reads	84.1	83.84	84.75	83.53	83.85	83.52	83.47	83.89	84.25	83.76	84.55	84.49	83.69	83.47	84.22	83.64	83.69	83.73	83.15	83.78	84.04	84.14	84.78	84.25
Percent aligned read 1	84.1	83.84	84.75	83.53	83.85	83.52	83.47	83.89	84.25	83.76	84.55	84.49	83.69	83.47	84.22	83.64	83.69	83.73	83.15	83.78	84.04	84.14	84.78	84.25
Percent aligned read 2	84.1	83.84	84.75	83.53	83.85	83.52	83.47	83.89	84.25	83.76	84.55	84.49	83.69	83.47	84.22	83.64	83.69	83.73	83.15	83.78	84.04	84.14	84.78	84.25
Targeted unique aligned bases	8325754655	7373544239	6499014598	5655170366	6052599208	7247620377	7056644156	6918641268	7299480994	7417151965	5975820032	9011312765	7843810789	6089245832	8263830528	8411321487	6838917812	6892269455	5191165385	7467108323	6433680025	6922611566	5889181796	6993677208
Padded target unique aligned bases	10089742758	8947629708	7769783277	6779575763	7272388961	8738747274	8506072951	8269811600	8817205878	8940956932	7200536214	10880691880	9589862921	7385131110	9925475460	10142134920	8270813698	8175351378	6298956187	9042975292	7771384978	8420361802	7084547225	8475019130
Unique base enrichment	71.41	69.48	72.15	72.43	69.3	70.14	70.09	71.59	71.13	70.14	70.96	68.79	67.58	70.28	70.46	70.89	69.85	72.5	68.28	68.38	71.8	70.5	71.02	68.2
Padded unique base enrichment	86.54	84.31	86.25	86.83	83.26	84.57	84.48	85.58	85.92	84.55	85.51	83.07	82.63	85.23	84.62	85.48	84.47	85.99	82.85	82.81	86.73	85.76	85.44	82.64
Targeted overlapping bases	853976662	764704622	750201693	648443745	637777555	795452349	765852579	803722291	783647892	805708271	647599963	945685958	747737673	623820241	927128798	901317226	714738334	831233667	519300462	762147770	644071647	700470748	652653160	722669624
Total PF bases	13375496889	12040997342	9885287919	8906147643	9499348952	11537803359	11358162533	11908477880	11261123956	11832785998	10328714816	14286669818	12620680752	9645492682	13310957728	13268092588	10934983915	10606042102	8550844177	12282713380	10280706590	10793901531	10215804520	11476526627
Total aligned bases	13373647263	12039414054	9884036835	8904927277	9498099495	11536262992	11356657242	11906925877	11259681788	11831212077	10327358478	14284778422	12619014830	9644225086	13309207243	13266358076	10933507636	10604663078	8549744724	12281160403	10279296943	10792533237	10214445701	11475052937
Unique aligned bases	11659425435	10612401371	9008111812	7807487118	8734183553	10333461943	10068337906	9663622081	10261670251	10574670841	8421113945	13098861448	11606274177	8664511606	11729088968	11865559778	9790869727	9507030044	7603146866	10919887445	8960681146	9819073030	8292163672	10254987456
Total aligned bases read 1	6683460415	6019054773	4940833484	4450753500	4749251134	5768305121	5678775525	5951011081	5628850630	5914104152	5159442257	7141690719	6313038958	4821244783	6654812331	6630317996	5464650391	5296550375	4273897996	6144080897	5134402357	5396792424	5102694080	5735504795
Total aligned bases read 2	6690186848	6020359281	4943203351	4454173777	4748848361	5767957871	5677881717	5955914796	5630831158	5917107925	5167916221	7143087703	6305975872	4822980303	6654394912	6636040080	5468857245	5308112703	4275846728	6137079506	5144894586	5395740813	5111751621	5739548142
Mean target coverage depth	77.5	68.7	60.5	52.7	56.4	67.5	65.7	64.4	68	69.1	55.6	83.9	73	56.7	76.9	78.3	63.7	64.2	48.3	69.5	59.9	64.5	54.8	65.1
Number of targeted regions covered end-to-end	436268	436800	435725	435504	435995	436133	436770	435913	435948	436145	436111	436381	436380	435609	436910	436108	436044	436247	436238	436085	435813	436001	435641	436152
Percent of targeted regions covered end-to-end	99.65	99.77	99.53	99.48	99.59	99.62	99.77	99.57	99.58	99.62	99.62	99.68	99.68	99.5	99.8	99.62	99.6	99.65	99.65	99.61	99.55	99.59	99.51	99.63
Uniformity of coverage (Pct > 0.2*mean)	98.07	98.13	97.47	97.61	98.08	97.97	97.87	97.78	98.03	98.22	97.31	98.4	98.5	97.73	97.97	97.99	98.15	97.58	98.09	98.28	98.07	98.17	97.9	97.95
Percent Target coverage at 1X	99.8254	99.9548	99.8106	99.8038	99.8083	99.8207	99.9531	99.823	99.8089	99.823	99.9308	99.8256	99.8311	99.7918	99.9563	99.8155	99.8108	99.9395	99.9418	99.8157	99.815	99.822	99.8042	99.8332
Percent Target coverage at 10X	99.2951	99.2342	98.641	98.1165	98.7785	99.0789	99.1406	98.8094	99.0698	99.1669	98.3167	99.4578	99.3746	98.5218	99.4051	99.2431	98.9973	98.7384	98.0896	99.1655	98.7419	98.9812	98.3345	99.0714
Percent Target coverage at 20X	96.4829	94.8143	92.1854	88.8773	92.1251	94.5793	94.109	93.0883	94.8917	95.2432	89.9395	97.4932	96.6043	91.366	96.1303	96.3883	93.9596	92.6693	88.0463	95.5424	92.6263	94.2301	90.0763	94.4697
Percent Target coverage at 50X	68.6855	60.9518	54.2607	45.7165	50.7217	60.3586	58.6079	57.3051	61.5667	62.2079	48.3734	73.0693	66.4524	50.22	67.155	68.816	57.2929	57.0571	40.3666	63.1159	53.9397	58.5024	47.9035	58.8447
Fragment length median	198	198	191	193	194	195	195	191	196	195	195	196	202	198	193	195	197	188	199	198	197	199	194	197
Fragment length min	106	105	105	104	106	105	105	104	105	105	105	106	107	106	105	106	105	104	106	106	106	106	105	106
Fragment length max	480	474	467	467	464	475	473	480	478	476	469	466	482	481	466	474	476	469	486	480	478	479	473	480
Fragment length SD	64	62	58	60	57	61	60	60	63	61	60	59	65	64	58	61	61	56	66	63	61	64	61	64
Directional Library	TRUE	TRUE	TRUE	TRUE	TRUE	TRUE	TRUE	TRUE	TRUE	TRUE	TRUE	TRUE	TRUE	TRUE	TRUE	TRUE	TRUE	TRUE	TRUE	TRUE	TRUE	TRUE	TRUE	TRUE
Flag PCR duplicates	TRUE	TRUE	TRUE	TRUE	TRUE	TRUE	TRUE	TRUE	TRUE	TRUE	TRUE	TRUE	TRUE	TRUE	TRUE	TRUE	TRUE	TRUE	TRUE	TRUE	TRUE	TRUE	TRUE	TRUE
Remove duplicate methylation calls in overlapping regions of paired end reads	TRUE	TRUE	TRUE	TRUE	TRUE	TRUE	TRUE	TRUE	TRUE	TRUE	TRUE	TRUE	TRUE	TRUE	TRUE	TRUE	TRUE	TRUE	TRUE	TRUE	TRUE	TRUE	TRUE	TRUE
Leading bases to ignore in methylation-calling	0	0	0	0	0	0	0	0	0	0	0	0	0	0	0	0	0	0	0	0	0	0	0	0
Enable cytosine report output	TRUE	TRUE	TRUE	TRUE	TRUE	TRUE	TRUE	TRUE	TRUE	TRUE	TRUE	TRUE	TRUE	TRUE	TRUE	TRUE	TRUE	TRUE	TRUE	TRUE	TRUE	TRUE	TRUE	TRUE
Read pairs aligned to top strand	9038856	8988276	6801744	5973786	7357075	8567717	8466908	8352709	7804758	8819141	7273720	11070580	9852920	6853545	9877575	9402324	8166087	7425330	6683304	9556504	6926875	7496743	7194224	8952139
Read pairs aligned to complementary top strand	0	0	0	0	0	0	0	0	0	0	0	0	0	0	0	0	0	0	0	0	0	0	0	0
Read pairs aligned to bottom strand	58646909	51960680	43190409	39123372	40700970	49842275	49036766	51903176	49159382	51070346	45002848	61173835	54014778	41995876	57472880	57774660	47198511	46285543	36566658	52578355	45121406	47113405	44491980	49100760
Read pairs aligned to complementary bottom strand	0	0	0	0	0	0	0	0	0	0	0	0	0	0	0	0	0	0	0	0	0	0	0	0
C's analyzed	3133891688	2811635895	2323184189	2085945554	2256097194	2697097156	2662038656	2773687877	2653655007	2784830139	2403315907	3355697200	2972710575	2256954822	3117243731	3107258134	2562384493	2488498226	2046125731	2905877873	2411990038	2535551959	2382645988	2700183060
Methylated C's in CpG	167896988	150855205	127523130	113403579	121333310	147502061	140677475	150875198	143803718	149942489	129948652	175532935	156506766	120982849	167537851	167220159	139174945	133606031	111667128	157620506	129381335	135718559	132085339	145900819
Methylated C's in CHG	3836513	3906231	3176151	2548412	2760081	3685085	3718466	3894034	3586986	3788438	3380980	4051382	3612366	2898030	4369526	3976620	3498083	3195850	2612024	3714665	2925392	3427265	3398948	3419850
Methylated C's in CHH	9380000	9854340	7791791	6221008	6747596	9233536	9325174	9589644	8768367	9427775	8340398	10049453	8939110	7118084	10996164	9796327	8701945	7833469	6263632	9053699	7134342	8413812	8346370	8424175
Methylated C's in others	7	3	4	3	4	7	4	3	3	3	0	7	1	1	7	10	12	5	0	5	6	3	4	2
Unmethylated C's in CpG	158647620	131722291	114447115	105126786	113215665	127311158	130088027	134948545	134398722	138204617	116963186	160996855	144073534	110662820	148097549	151604257	124590175	125556830	108293428	142858916	123526780	126827015	114862130	129486391
Unmethylated C's in CHG	756589710	673528970	560303951	503688777	544708480	648424121	639168499	668226804	640753600	672179948	579123998	805493374	714221192	544134927	747701793	749552736	617543028	601406923	497114019	701512955	582836847	611309498	574471876	650355225
Unmethylated C's in CHH	2037540857	1841768858	1509942051	1354956992	1467332062	1760941195	1739061015	1806153652	1722343614	1811286872	1565558693	2199573201	1945357607	1471158112	2038540848	2025108035	1668876317	1616899123	1320175500	1891117132	1566185342	1649855810	1549481325	1762596600
Unmethylated C's in others	690	648	613	466	626	573	607	758	625	536	482	767	598	531	791	921	657	623	496	567	558	483	622	697
Percent Methylated C's in CpG	51.42	53.39	52.7	51.89	51.73	53.67	51.96	52.79	51.69	52.04	52.63	52.16	52.07	52.23	53.08	52.45	52.76	51.55	50.77	52.46	51.16	51.69	53.49	52.98
Percent Methylated C's in CHG	0.5	0.58	0.56	0.5	0.5	0.57	0.58	0.58	0.56	0.56	0.58	0.5	0.5	0.53	0.58	0.53	0.56	0.53	0.52	0.53	0.5	0.56	0.59	0.52
Percent Methylated C's in CHH	0.46	0.53	0.51	0.46	0.46	0.52	0.53	0.53	0.51	0.52	0.53	0.45	0.46	0.48	0.54	0.48	0.52	0.48	0.47	0.48	0.45	0.51	0.54	0.48
Percent Methylated C's in others	1	0.46	0.65	0.64	0.63	1.21	0.65	0.39	0.48	0.56	0	0.9	0.17	0.19	0.88	1.07	1.79	0.8	0	0.87	1.06	0.62	0.64	0.29

## Sheet: Table S2
Supplementary Table 2. One hundred and six DMRs identified in the first cohort by MC-Seq.
A. DMRs composed of three or more CpGs showing Db≧25%
	Chromosome	Start	End	Distance (bp)	#CpG sitesa	ADb	Genec	Positiond	Duplicated in B
1	1	1912391	1913579	1188	5	hypo	CFAP74	intron	*
2	2	113993304	113993328	24	3	hyper	PAX8	intron	*
3	5	2564514	2564663	149	3	hypo		intron
4	6	56096055	56096198	143	3	hyper	COL21A1	intron
5	7	76129240	76129420	180	8	hypo	DTX2	intron	*
6	9	31211275	31211339	64	6	hyper			*
7	10	60277089	60277489	400	3	hyper	BICC1	intron
8	11	10530844	10530932	88	6	hypo	MTRNR2L8	downstream	*
9	13	114965050	114965826	776	10	hypo			*
10	16	68720344	68722048	1704	3	hyper	CDH3	intron
11	16	88960268	88963904	3636	7	hyper	CBFA2T3	exon-intron
12	17	99757	99908	151	3	hyper
13	17	4612609	4612668	59	10	hypo			*
14	18	112336	112352	16	3	hypo	ROCK1P1	exon-intron	*
15	19	46915445	46915567	122	4	hyper	CCDC8	exon	*
16	20	61462447	61462465	18	3	hypo	COL9A3	intron	*
B. DMRs composed of five or more CpGs showing Db≧15%
	Chromosome	Start	End	Distance (bp)	#CpG sitesa	ADb	Genec	Positiond	Validated
1	1	1910745	1913579	2834	16	hypo	CFAP74	intron
2	1	2082315	2082978	663	5	hypo	PRKCZ	exon
3	1	7973162	7973298	136	5	hypo	TNFRSF9	upstream
4	1	28611493	28611643	150	6	hypo	SESN2	upstream
5	1	31873536	31874123	587	5	hypo
6	1	200983238	200983382	144	11	hypo	KIF21B	intron
7	1	228658973	228659187	214	5	hypo
8	1	230289891	230290160	269	7	hypo	GALNT2	intron
9	2	1801619	1802045	426	9	hypo	MYT1L	intron
10	2	9879511	9879855	344	9	hypo
11	2	31454468	31454664	196	5	hypo	CAPN14	intron
12	2	39470987	39471160	173	10	hyper	CDKL4	exon-intron
13	2	113992706	113993867	1161	62	hyper	PAX8	intron
14	2	140168533	140169039	506	14	hypo
15	2	238769253	238769422	169	6	hypo	RAMP1	intron
16	2	238814739	238814909	170	8	hypo	RAMP1	intron
17	3	50230887	50231168	281	6	hypo	GNAT1	exon-intron
18	3	72136066	72136104	38	6	hypo	LINC00877	intron
19	3	196612887	196613008	121	5	hypo	SENP5	exon
20	3	197827260	197828110	850	5	hypo
21	3	197832207	197832507	300	5	hypo
22	4	190988025	190988231	206	15	hypo	DBET	exon
23	4	191003695	191003878	183	5	hypo
24	5	1856726	1857620	894	19	hypo	LINC02116	upstream
25	5	14758150	14758292	142	5	hypo	ANKH	intron	*
26	5	140725393	140725828	435	5	hypo	PCDHGA1	exon
27	6	5827737	5827995	258	5	hypo
28	6	29648468	29649024	556	5	hypo
29	6	30297302	30297338	36	5	hypo	TRIM39	exon
30	6	56297896	56298186	290	6	hypo
31	6	163570267	163570381	114	11	hypo	PACRG	intron
32	7	6462965	6463147	182	9	hypo	DAGLB	intron
33	7	76129240	76129464	224	16	hypo	DTX2	intron
34	7	100751679	100751760	81	5	hypo
35	7	127761990	127762163	173	5	hypo
36	7	156741425	156741664	239	14	hypo	NOM1	upstream
37	7	157369238	157369388	150	6	hypo	PTPRN2	exon-intron
38	8	1511098	1511700	602	5	hypo	DLGAP2	intron
39	8	142819563	142819617	54	7	hypo
40	9	31211270	31211383	113	8	hyper
41	9	38526747	38526915	168	10	hypo
42	9	44164104	44164294	190	8	hypo
43	9	68809663	68810217	554	8	hypo
44	9	94860379	94860545	166	12	hypo	SPTLC1	intron
45	9	115851597	115851954	357	7	hypo
46	9	129184064	129184293	229	6	hypo	MVB12B	exon-intron
47	9	130590758	130591081	323	5	hypo	ENG	intron
48	10	1341526	1341870	344	6	hypo	ADARB2	intron
49	11	10530844	10530932	88	6	hypo	MTRNR2L8	downstream
50	11	35329895	35329995	100	5	hypo	SLC1A2	intron
51	11	67052656	67052985	329	7	hypo	GRK2	exon-intron
52	12	57894138	57894252	114	7	hypo	MARS	exon	*
53	12	132293329	132293546	217	6	hyper
54	13	64651088	64651440	352	18	hypo	LINC00355	downstream
55	13	114432917	114433003	86	5	hypo	GRK1	intron
56	13	114965050	114965947	897	41	hypo
57	14	70039868	70040056	188	6	hypo	CCDC177	exon
58	14	91096636	91096751	115	5	hypo	TTC7B	intron
59	15	20150000	20150096	96	5	hypo
60	15	81410745	81410844	99	6	hyper
61	15	101084575	101084961	386	6	hypo	CERS3	exon
62	16	3639154	3639261	107	6	hypo	SLX4	exon
63	16	4102844	4102925	81	5	hypo	ADCY9	intron
64	16	11644754	11644817	63	5	hypo	LITAF	intron
65	16	33039597	33040292	695	11	hypo
66	16	33070536	33071156	620	11	hypo
67	16	34208297	34208973	676	6	hypo
68	16	53407558	53407784	226	9	hypo	NR_119378	exon
69	16	85539769	85539867	98	5	hypo
70	16	90163558	90163741	183	8	hypo
71	17	57088	57231	143	12	hyper
72	17	114067	114197	130	5	hyper	RPH3AL	intron
73	17	442406	442558	152	6	hypo	VPS53	intron
74	17	4081095	4081525	430	6	hypo	ANKFY1	intron	*
75	17	4612609	4612668	59	10	hypo
76	17	4804502	4805493	991	16	hypo	CHRNE	exon	*
77	17	19409934	19410030	96	5	hypo
78	17	27443816	27443937	121	5	hypo	MYO18A	intron
79	17	56584615	56584718	103	5	hypo	MTMR4	exon-intron
80	17	79325095	79325263	168	9	hypo
81	18	112319	112415	96	11	hypo	ROCK1P1	exon-intron
82	18	12777564	12777974	410	10	hyper
83	18	46269553	46269668	115	5	hypo	CTIF	intron
84	18	74257757	74257931	174	5	hypo	LINC00908	intron	*
85	19	2528954	2529086	132	5	hypo	GNG7	intron
86	19	2888934	2889140	206	5	hypo
87	19	10403695	10405369	1674	30	hyper	ICAM5	exon-intron
88	19	16437426	16437889	463	5	hyper	KLF2	exon-intron	*
89	19	46915312	46915870	558	38	hyper	CCDC8	exon
90	19	49000700	49001850	1150	16	hypo	LMTK3	exon
91	19	54945843	54946056	213	7	hyper	TTYH1	intron
92	20	29518816	29518931	115	5	hypo	LINC01597	intron
93	20	60243360	60243549	189	5	hyper	CDH4	intron
94	20	61462320	61462528	208	12	hypo	COL9A3	intron
95	20	61660622	61660880	258	6	hypo	LINC01749	intron
96	20	61665921	61666302	381	5	hyper	LINC01749	exon-intron
97	21	15351937	15353030	1093	6	hypo	ANKRD20A11P	exon-intron
98	22	22471869	22472218	349	21	hypo
99	22	43166020	43166120	100	5	hyper
100	22	51016254	51017186	932	12	hypo	CPT1B	exon-intron
aNumber of CpG dinucleotides in DMR. bMethylation status in AD relative to CN. cBlanks in the row of Gene indicate DMRs in intergenic regions. dRelative position of DMR to the gene. Abbreviations: hypo, hypomethylation; hyper, hypermethylation.

## Sheet: Table S3
Supplementary Table 3. List of DMRs unable to be validated.
A. DMRs for which PCR primers were unable to be designed.
	Chromosomal position of DMR
Chromosome	Start	End	ADa	Geneb	Positionc
1	31873536	31874123	hypo
3	197827260	197828110	hypo
3	197832207	197832507	hypo
4	190988025	190988231	hypo	DBET	exon
4	191003695	191003878	hypo
5	2564514	2564663	hypo
6	30297302	30297338	hypo	TRIM39	exon
7	6462965	6463147	hypo	DAGLB	intron
8	1511098	1511700	hypo	DLGAP2	intron
13	64651088	64651440	hypo	LINC00355	downstream
13	114432917	114433003	hypo	GRK1	intron
13	114965050	114965947	hypo
17	4612609	4612668	hypo
17	19409934	19410030	hypo
17	79325095	79325263	hypo
B. DMRs for which PCR failed to generate single amplicons.
	Chromosomal position of DMR
Chromosome	Start	End	ADa	Geneb	Positionc
1	1910745	1913579	hypo	CFAP74	intron
15	101084575	101084961	hypo	CERS3	exon
17	114067	114197	hyper	RPH3AL	intron
aMethylation status in AD relative to CN. bBlanks in the row of Gene indicate DMRs in intergenic regions. cRelative position of DMR to the gene. Abbreviations: hypo, hypomethylation; hyper, hypermethylation.

## Sheet: Table S4
Supplementary Table 4. List of the bisulfite amplicon PCR primer set
	Position of amplicon (hg19)							Sequence
Chromosome	Start	End	ADa	Geneb	Positionc	Number of CpG sites	Amplicon (bp)	Fowerd primer	Reverse primer	unmapped amplicon
1	2082273	2082555	hypo	PRKCZ	exon	17	284	TTAGGGGTTTGGGTTGTAGG	ACATAACTATTAATTTTACACAAACTCC
	2082735	2082925				5	191	ATTGTAGGTAGTGAGGGGATTATTA	ATTCAACTCAACCCCAAAAATTT
	7973067	7973240	hypo	TNFRSF9	upstream	4	174	TGTTTTTATAGAGGGTAAGTTTTTTTAATT	TAAAACAAAATCCCATATCTCTCAC
	7973220	7973428				8	209	AGATATGGGATTTTGTTTTATTTGG	ACAAATATCCTATCTTAAATATCCC
	28611462	28611742	hypo	SESN2	upstream	8	281	TTATAGAATGGGAATAGATTTTTTTT	ATAAATATCAACCATCAAATCCAAC
	200983164	200983407	hypo	KIF21B	intron	18	244	GGGTTTATTTGTTATTTGGTAATT	CTAAAAAAATAAAAACTCCCCAACC
	228658997	228659185	hypo			16	189	GTATGTTTTGAGTTTGGGTTGTTTT	AATCCAAAAAACCTAAACCTTCATCT
	230289929	230290187	hypo	GALNT2	intron	7	259	TTTAGTTTTGTTAGAAGTTAAGTTGT	AAAATCCAAAAATCTCTCACCTATAC	*
2	1802127	1802366	hypo	MYT1L	intron	5	240	TTAGATTTAAATTTGGATTTTTTTT	TAACATATTCAAAACACACTAACAC
	9879486	9879763	hypo			16	278	TGGGTTTTTATTTATAAAGTTTTTG	AAATATAAAAAAACTAAACCCTTCC
	9879678	9879972				13	295	GGTTTTGTTTTTGGTTTTTAATTTTT	AAAAAAACTCCAAACTACCTCTCCT
	31454443	31454723	hypo	CAPN14	intron	10	281	AGATTTTAATTATTTAAGATTGAGA	ACCTTCCTAATAAAACAAAACTTAC	*
	39470948	39471219	hyper	CDKL4	exon-intron	34	272	GGGGTTGTTAGAGTTAGGGGAATT	ACTCACCCCATCAACCCC
	113992716	13992989	hyper	PAX8	intron	12	274	TTTTAGGGTTTTTGTTTTTTTATGG	AACCAAACCCTCCTCTCAAATAC
	140168758	140169009	hypo			7	252	TTTTATTTTTGAGTTAGGGAGATTA	AACTACAAAAAAACACAAAAAAACTTC
	238769066	238769341	hypo	RAMP1	intron	8	276	GTTTTTTATTTGGAGGGAGAAGTG	AAAAAAAACCACACATACCAAAAAC
	238769281	238769531				8	251	GGAGAATTTAGTGTTTTTGGGAAG	TACCACCCCTTAAAAAAATTTACAA
	238814694	238814972	hypo	RAMP1	intron	8	279	TTTTGTAGTTGAGAAGGTTGGATTT	TTAACCCATCCAAAAAACCTAATAA
3	50230690	50230973	hypo	GNAT1	exon-intron	21	284	GGTTTTAGGATTATTTATTAGGA	ATATCTACCATATACATCAACTTCC
	72135861	72136149	hypo	LINC00877	intron	10	289	TTGAATTTTTGGATTTGGTAATATTT	ACACTACTTCCCCAACAACTACACT
	196612819	196613033	hypo	SENP5	exon	6	215	AGGTTTGTAAGTTAAGAAAAGTTTAG	ATAACAATCAAACACATAAAAATTC
5	1856688	1856962	hypo	LINC02116	upstream	18	275	TTTTAAAATGATGAATATGGGTTTT	CCTCCCTTAAAAATACTCCCTCTAA
	14758105	14758317	hypo	ANKH	intron	6	213	TATAAGAATTTAAAGGTGGAAGTAA	CCTCAAAAAAATAAAATCATACAAC
	140723707	140723925	hypo	PCDHGA1	exon	17	219	TTGAGGAGTTAGATAAAGGTTTTTT	AAATATTAATTTTTACCAAACACAAC
6	5827698	5827943	hypo			5	246	TGATAGGATAATATGAATTTGGTAAGG	AAAAACACAAAATCCATTAAAAACC	**
	29648759	29649011	hypo			25	253	AAGAGTTAGAGGAGTGGGGATAATATT	CATCTAAATCAAAAAACACATTCTC	*
	56095984	56096257	hyper	COL21A1	intron	4	274	TTTAAATAAAATATGATTATGTTTAAAAGA	AAATACAAAAAATCTAATTCTCAATACTAT	**
	56297794	56297978	hypo			7	185	TGAGGAGGTTGTGTGTAGTATAGGA	TAAACAACTTTTAATTTTAAAAACAACTAA
	56297954	56298241				31	288	TGTTTTTAAAATTAAAAGTTGTTTATTGTA	ATCACTCCAACTAACCCAAAAAA
	163570080	163570331	hypo	PACRG	intron	8	252	GATTGGTTTTGTTAGGAGGAAATAGT	AAAAAAAACCTAAAAAAAACC	**
7	76129077	76129345	hypo	DTX2	intron	11	269	TGTTTATGGAGATGTAGTTTTTTTT	ACATTACCCTAACATAAACATCACAAA
	76129334	76129506				15	173	TTAGGGTAATGTAAGTTGAATTAAAT	AAAACAAAAACAACAACACAATCTC
	100751600	100751785	hypo			7	186	AGTTTTGGGGAGGTTTTGTAATTAT	CAAAACTATCCCCCTTAACCTAAAC
	127761880	127762116	hypo			8	237	GGAAATAGTGGAGAGTATAGGTAGT	ATACCTTAAAAACCTAAAAAATCAC
	156741554	156741702	hypo	NOM1	downstream	8	149	TTATTTAGTAAAGAGGAATTTTAAA	CTCCTAAAAAACAAACTCTAAATAC
	157369195	157369332	hypo	PTPRN2	exon-intron	28	238	TTTTAATATTTTTGAAGTTAGAAAAT	CCTCAAAATCCCTCCTAAACTTC
	157369324	157369485				7	162	ATTTTGAGGAGGAAGGGATTTT	CTCCTCCCTACCAAATAAACCTAAT
8	142819158	142819388	hypo			12	231	AAGGATAAGGTAGGTGTGGTTTAGAG	ACAACCCAACCCAACAATTC	**
9	31211238	31211408	hyper			8	171	GGTTTTAGAATATTTTTGGTTTGAAG	CAACCAATATAAAAAAAACACCAAC
	38526621	38526914	hypo			34	294	TTTTAAAAATTAGAAATGTAGAAAAA	AATCAACCCCTTACAAAAAACC
	38526893	38527113				7	222	GGTTTTTTGTAAGGGGTTGATT	AAACCCTCTTCTATCCCTCATACTT
	44164076	44164331	hypo			19	256	TGTTTATATGATTAAATGATTTTTTGAA	AAAACTCCCTCACAACTATCCTATC
	68810042	68810245	hypo			19	204	GGGATGTTTTAAAAGTTTGATTTTAG	CACTCCCAAAAAAATAAAAAAAC	**
	94860189	94860431	hypo	SPTLC1	intron	8	243	TAATAAGGTTTTTGTTTAAAGGAAAAA	CCAAATCAAAATAACCAAAATAACTAC
	94860415	94860712				18	298	TGGTTATTTTGATTTGGTATTTT	AAACAAAAATCTTTACTAAACTCTC
	115851534	115851827	hypo			19	294	TTTTTTATTTTTTGGTGTGTATTTG	CCTCTAACCCACTCTCCTCTACTAC	*
	129184072	129184333	hypo	MVB12B	exon-intron	10	262	TTTTTTGAGTTTTGGGGAATGT	AAAAAATAAAACAAACAAATCCCAC	**
	130590605	130590832	hypo	ENG	intron	23	228	TTGTAAAATGGGGATATAGTAGGGTA	CCAAAATAAAACAAAAACATAAAAC
	130591014	130591265				5	252	TTGATTGTTTTTGTGTTGTTTTTGT	CTTACCAACACTACCTCCTCCATAA
10	1341405	1341607		ADARB2	intron	4	203	GGGTTTTAGATGGGGAAATTTATAA	AAATCTTCACCAAAAACAAAAAAAA
	1341583	1341796				4	214	TTTTTTTTGTTTTTGGTGAAGATTTA	AAACACAACCTCATCCTCCTATAAT
	1341792	1341990				4	199	TGTTTTGTAGATTTTATGGGGAAGT	CAAAAACCCAAACCAAAAACTACTA
	60277054	60277285		BICC1	intron	2	232	AGTGATAGGTAGAATTGGGGTTA	CCCATTTTCACACATTTTTAACTTCATAT
	60277250	60277524				1	275	GGAAGAAATATGAAGTTAAAAATGTGTG	ACTACCATTAACTACCCCATTTAAAA
11	10530743	10530957	hypo	MTRNR2L8	downstream	7	215	GGTTAAGTTGAGTTGAAATTTTTTAAGT	ACTTAATTAAACAAAACCCTAAAAC	*
	35329853	35330069	hypo	SLC1A2	intron	5	217	TAAAGGTTAGTGATGTAAGTTGAAGTTGA	ACTTCCCAATCTCCAAAATAATAAAA
	67052548	67052755	hypo	GRK2	exon-intron	7	208	GAGTTTGTTGATTATGGAGGAGATT	TACACATACCAAACCCAACTCTATC
	67052763	67052960				16	198	TTTGAGTTGGTGTAGTGGAAGAAG	CAAAATAAATTAAAAATTTATAAAAAAC
	67052830	67053053				14	224	GGGTGTTTAAGATGAAGAATAAGT	AAAAACTAAACCAAACTAAAACCAC
12	57894112	57894279	hypo	MARS	exon	7	168	AGGATATTTTTTAGTAGTTGTTGAAA	TACCACACTTATCACACTAATCACC
	132293754	132293943	hyper			8	190	GTTTTAGAGGGTTTTAGGGTAGGAG	ACATCACAACAACATAACACATATATACAT	*
14	70037996	70038176	hypo	CCDC177	exon	8	181	GATGTGGGTAGATTGTGTTGTTATTT	CTAAAACCTCCCTCAACCACTAAC
	91096550	91096738	hypo	TTC7B	intron	5	189	GGGGATTTTGTTTTTTTTGATAAGTA	AACCCTTCTACTCTTAAAATTCTCC
15	20150028	20150239	hypo			9	212	GGTTTTTTGTAGGTTTTTGTTTT	ATCCTCTTATTTTCCCCAATTATTC
	81410680	81410877	hyper			14	198	GTTTTAGAGGGTGAGTGGT	ACCCTCTTTAAACACTCTTACA
16	3639131	3639361	hypo	SLX4	exon	6	231	GGTTTGTTATTTTTTAGGGAGTT	CTACTAACACATAAAACCCCTCTC
	4102699	4102967	hypo	ADCY9	intron	6	269	GTTGTTTGAAGTTATTTGGTTTGAG	CCCTAACAAAAAATCTATTATTCCC
	11644656	11644890	hypo	LITAF	intron	6	235	ATATTTTTATTTTGATGAGTTATGG	AACATTATTTAAAAAACTCTACTTAATTAC	**
	33039806	33040075	hypo			24	270	AGAGGGGGTAAAAAGTAGG	ACCCCCACTATCAAAACTTT	*
	33040156	33040438				28	283	GGTGGTTTGGGTTAAAAGTTATG	CAACTTTTTAAATCTTTCTCCCC	*
	33071037	33071244	hypo			12	208	GGTTTTGAGGGAGGGAGTAGTAGA	ACCCCCCTCCTTATTCTCTCCCATC	**
	34208125	34208400	hypo			27	276	TAATTTATAGAATTGGAGAGAATATTTTT	AACCCCTTCTTAATTCTTCACTCTC
	34208870	34209044				10	175	ATAGTTTGGGTGTTTTTTTTGATG	CCCCTACCTAAAAATCCTAAAATCT
	53407512	53407720	hypo	NR_119378	exon	14	209	TAGGGGGAGAAGGAGGTTTTA	CCCACATACTAAAAAATACAATACCC
	53407694	53407839				7	146	TGGGTATTGTATTTTTTAGTATGTGG	TCTAATTTCTCCCCAACCTCTTTATA
	68720103	68720372	hyper	CDH3	intron	15	270	TTAGTGGTTTGTATAGGGTTTTTGG	TACCTCCTTTAATTACAATTTCAAC
	68721098	68721365				4	268	GTAGTAGGGTTGTGAAGGGAAGTT	CCTCAAAAAAACTCCTCCTATTTAC
	68721852	68722079				6	228	TTTTTTTGTGTAGATGGAAAAATTG	AAAACCCCTAAAAAACCATTCTAAC
	85539744	85539891	hypo			5	148	AGTTTTTTATGGTAGTTTTGGTTAG	AAAAATTCAATTCCTAAACCTCAC
	88960141	88960361	hyper	CBFA2T3	exon-intron	7	221	TAGATATGGGGTTGTTATGGAAAGT	TCCCCTATCAACAAAAAACTTAAAA
	88961596	88961834				10	239	ATTTTTTAGAGGGTATTGATTAGTT	TATATACAAATATAAAACCCAACCC
	88963668	88963947				10	280	GGTTGTGAAAAGGATAGTTTTGTGTA	CTCAACAAACTTAAATCACCAACAA
	88962961	88963150				7	190	TAATGGTGAGTTTTATGTGGTTATA	CTACTAAAAAATCCACAATCCTAAC
	90163525	90163721	hypo			7	197	TGGGAATTTTGAGGTTTTTAAGTTA	ACCAACAACCTAAACTCCAAACTAA
	90163633	90163886				4	254	TTGGTTTTAGAGTTTGGAGTTTTAT	CCCTCTCCTTTAAAAACAAATTAAC
17	57065	57307	hyper			15	242	TTGGGGTGGAAATTTTTTAATT	CCCATTAAAACCAACTCACCTATAA
	99589	99859	hyper			15	271	AGTTTTTATTTATTAAGTTTTATTATTG	TAAAAACTCCCAAAAATCCC	**
	442367	442583	hypo	VPS53	intron	6	217	TTTTAAGTTGGTAGTTTTGTATATTTTAAA	AACCAATAATCATCAAAAAAAATTC	**
	4081004	4081172	hypo	ANKFY1	intron	7	169	TATTTTGATGTTTTAGTTGTATTGT	TAAACTCTATTAACTTTCCATCAAC
	4081155	4081404				14	250	GAAAGTTAATAGAGTTTAATGAAATTAAAG	CAAATAATATAAAATAACCTCTCCC
	4081354	4081597				9	244	TTAGTTTTATATTGGAGAGAAGAAA	CCAACCAACACCTAAAATACTAAC
	4805020	4805280	hypo	CHRNE	exon-intron	21	261	AAGTTTATTTTTTTATTTAAGTTTAGTT	AATAAAAATCACCTACTTCCCCTTC
	4805256	4805438				15	183	GAAGGGGAAGTAGGTGATTTTTATT	AATACTCTAAAAAAATACAAACCTATACAA
	4805407	4805634				8	228	TTTTGTATAGGTTTGTATTTTTTTAGAGTA	CCCCACCCCTTAAAATTAACA
	27443767	27444002	hypo	MYO18A	intron	8	236	GGAAAATATTGGAAGTTTTGAGG	CTACCCAAAAAAAACCAAACTCTAA
	56584562	56584743	hypo	MTMR4	exon-intron	7	182	TTAGGGTATAGGTTTTAGTAATGGA	CCTAAAATAAACCTCTAAAAACTTC
18	112285	112564	hypo	ROCK1P1	exon-intron	21	280	GATTTAGAAGGTAGGAATTTTAGGT	AACAACTTACTCTATATCTAACCCTTTCC
	12777440	12777696	hyper			21	257	GAATAGTTTTGGAGTTAAAAGGGAA	ATCAAAAATAATACAAAAAAACC
	12777865	12778022				9	158	TGGTGTTGGAGTTTTTTAGGTAGGA	ACCTACAATCCCCTAAATATTCC
	46269439	46269694	hypo	CTIF	intron	7	256	TATTGATATTAAAAGGTTGGTTTATGAG	AAAAAATACTTCTATCCAAATTACAC
	74257557	74257823	hypo	LINC00908	intron	8	267	TTGTTTTGGGGGTAGTTTAATTAAG	TCCTCACCAAACCATAAAAAATAAC
	74257807	74257980				4	174	TTATGGTTTGGTGAGGAAATTAGAG	TACAAACAAATCACACCTTCAAAAC
19	2528929	2529176	hypo	GNG7	intron	9	248	GGTGGTTGGAATATTTTGTATTTAG	AACACCCAATTTATAACTCTATCCC
	2888807	2889001	hypo			10	197	AGTTTTTAGTTGTTTTTAGGGTATAG	ATATCTATAATCCCCTCCTTCTC
	2888981	2889195				20	215	GAGAAGGAGGGGATTATAGATAT	ATTTCAACATCAATCCTACAAAC
	10403538	10403785	hyper	ICAM5	exon-intron	19	248	TTTATGTGAGTTGGTGATAATTTTT	CAATACACTAAAAATTCTAAATTCCC
	10403816	10404005				10	190	TTTGGGTTTGTTGGGTTTAGTTAT	CCCTACTCCTACTCTTCCCTAAAAA
	10403980	10404212				12	233	GTTTTTAGGGAAGAGTAGGAGTAGG	AAAAACTTCCTAAACCACCAATAAC
	10404192	10404434				8	243	TTGGTGGTTTAGGAAGTTTTTAGATAG	TCTATTCCCTCCAACCAAATAATAC
	10405199	10405400				15	202	GAAGGTATTTTATGGTTTGAGTAGTAG	AAAAAATACCCTTAAATACTCCCAC
	16437402	16437679	hyper	KLF2	exon-intron	17	278	GAGAGAGGGTGTATGTTTAGGATT	TAAAACTTCTCACCTACAAAAAAAA
	16437655	16437936				30	282	TTTTTTTTGTAGGTGAGAAGTTTTATTATT	AAATCCAATAAATACCAATCACAATTTA
	46915278	46915550	hyper	CCDC8	exon	17	273	GTTTAGGGGAAGTTTGGGGTATATA	TCAACCTACCAATACCCATATTTAAA
	46915527	46915826				27	300	TAAATATGGGTATTGGTAGGTTGA	AAATACAACAAATAATAACTCCTCC
	49000675	4900790	hypo	LMTK3	exon	8	116	AGGGGGTTTTAAGTTTAAGAATAGT	AAACCCCAAACAACAAAACC
	49000999	49001180				11	182	GAGGTTTAGTTTTTTAGTTTTTGGG	AAACCTCTCTAAAAAAAACCCCTAC
	49001645	49001928				19	284	GGGTTTTTTTTAGTTTTTTTGGGTTTTGTT	CCTTTTTCCCCAAAAAAAACCTTC
	54945778	54946026	hyper	TTYH1	intron	9	249	GTTTGGGGTAGAGTAGGTTTTGTTA	ACTCCTCACCCAACCAAATATC
20	29518817	29519106	hypo	LINC01597	intron	22	290	GTAGTTTATTTTTTAGGAGTGGAG	ACTAAATTCCTATACTACTTCCCCC
	60243372	60243574	hyper	CDH4	intron	4	188	AGGTTGGGTATTATTTTAGGGAAGT	TAAACTAAATTCCCCCTACCTACAC
	60243208	60243395				5	203	TGTAGGTAGGGGGAATTTAGTTTAG	ACACATAAACCCCAATAATAAACAC
	61462204	61462429	hypo	COL9A3	intron	13	226	ATTTGGTTATGGGTAGTGTTTTTTT	TAACTCTTAAACCTCAACCTCCAC
	61462406	61462579				9	174	GTGGAGGTTGAGGTTTAAGAGTTA	ACTACTACAAAACCAACAAAAAAAA
	61660714	61660906	hypo	LINC01749	intron	11	193	TTGTGTGTAGGTTTAAGTTTGTTAA	AAAAAAACCTTTTAAAAAAAATCCC
	61665928	61666192	hyper	LINC01749	exon-intron	18	265	TGAGTGTTATTAATAAGTTATAGAAGAGAA	AACCCTACAAACATATCCTACTCAC	*
21	15351867	15352124	hypo	ANKRD20A11P	exon-intron	19	258	TTTAGTTAGGGAATTATGAGGGATG	ACAAAAAATCCACAAAACAACTATC
	15352018	15352238				16	221	GTTATTTGTGTTGTTTGTTTAGGG	AAAAATCACCACCATAAAATTATTC
	15352915	15353102				11	188	ATAATTTTTTTAATTTGTTTTTTGT	CTATCTAAAAAAACACTACCCATC
22	22471748	22472017	hypo			16	270	TTGTGTATTTATTGTGGTTTTTTTT	AACTTCTACATTAACCTAAACTCCC
	22472003	22472142				15	140	GTTAATGTAGAAGTTGTTTATTTGGTTTAG	AAATCTTCCCCACCAAAAAC
	22472123	22472298				15	176	GTTTTTGGTGGGGAAGATTT	CCTTCCTAATACCTAAACCTAAACC
	43165923	43166170	hyper			18	248	ATAGGGTATAGGTGGGTTTTTAGTT	CCCTATTTATAATTCTTATCATTTTACTC
	51017096	51017375	hypo	CPT1B	exon-intron	7	280	TAGTTAAATGTAGGGAAAAGGTTAT	CTAAACAACAACAAAAAATACCAAAC
aMethylation status in AD relative to CN. bBlanks in the row of Gene indicate DMRs to in intergenic regions. cRelative position of DMR to the gene, and one cell in this row corresponds to one DMR. Abbreviations: hypo, hypomethylation; hyper, hypermethylation; *, number of reads < 10; **, not uniquely mapped to the reference genome.

## Sheet: Table S5
Supplementary Table 5. Amplicons that were successfully amplified, but failed to be used for validation
A. Coverage<10
Chrromosome	Start	End	Length (bp)	#CpG sites	ADa	Gene	Position
1	230289891	230290160	270	7	hypo	GALNT2	intron
2	31454468	31454664	197	5	hypo	CAPN14	intron
6	29648468	29649024	557	5	hypo
9	115851597	115851954	358	7	hypo
11	10530844	10530932	89	6	hypo	MTRNR2L8	downstream
12	132293329	132293546	218	6	hyper
16	33039597	33040292	696	11	hypo
20	61665921	61666302	382	5	hyper	LINC01749	exon-intron
B. Not uniquely mapped
Chrromosome	Start	End	Length (bp)	#CpG sites	ADa	Gene	Position
6	5827737	5827995	259	5	hypo
6	163570267	163570381	115	11	hypo	PACRG	intron
6	56096055	56096198	144	3	hyper	COL21A1	intron
8	142819563	142819617	55	7	hypo
9	68809663	68810217	555	8	hypo
9	129184064	129184293	230	6	hypo	MVB12B	exon-intron
16	11644754	11644817	64	5	hypo	LITAF	intron
16	33070536	33071156	621	11	hypo
17	99757	99908	152	3	hyper
17	442406	442558	153	6	hypo	VPS53	intron
aMethylation status in AD relative to CN.

## Sheet: Table S6
Supplementary Table 6. List of CpGs used for machine learning
Chromosome	Gene	Amplicon (bp)	Location	Positions of CpG sites in hg19
5	ANKH	213	intron	14758130, 14758150, 14758154, 14758257, 14758271, 14758292
12	MARS	169	exon	57894138, 57894174, 57894192, 57894207, 57894212, 57894221, 57894252
17	ANKFY1	594	intron	4081029, 4081039, 4081066, 4081095, 4081111, 4081135, 4081379, 4081411, 4081428, 4081462, 4081471, 4081509, 4081525, 4081527
18	LINC00908	424	intron	74257894, 74257931, 74257942
19	KLF2	536	exon-intron	16437544, 16437564, 16437601, 16437651, 16437695, 16437701, 16437715, 16437717, 16437725, 16437733, 16437735, 16437744, 16437754, 16437762, 16437785, 16437789, 16437799, 16437801, 16437806, 16437817, 16437831, 16437844, 16437849, 16437855, 16437865, 16437869, 16437873, 16437878, 16437892, 16437896

## Sheet: Table S7
Supplementary Table 7. The diagnostic ability for AD by only APOE or APOE with DMRs
		3-fold cross validation				Discovery			Test
DMRs	Covariate	C parametera	Accuracyb	AUCc		AUC	95%CI		AUC	95%CI
-	APOE	0.1	0.712	0.712		0.722	0.64 - 0.80		0.766	0.61 - 0.91
ANKH, MARS	APOE	100	0.736	0.736		0.901	0.85 - 0.95		0.81	0.67 - 0.95
aOne of the four C parameters, i.e., 0.1, 1, 10, and 100, which conferred the best average AUC in the 3-fold cross validation as depicted in Fig. 5A. bAccuracy and cAUC were averages of those obtained with the three validation sets using the C parameter indicated.
